# Supplementary material
Source: MDPI journal article supplement (https://www.mdpi.com/2073-4433/14/5/893)
Supplement: s1 [file s1]

# Supplementary Materials:

**Table S1.** Instrumental conditions for digestion in microwave Ultrawave Milestone.

| Time (min) | Temperature (°C) | Power (W) | Pressure (bar) |
|------------|------------------|-----------|----------------|
| 5          | 100              | 1200      | 70             |
| 7          | 130              | 1300      | 100            |
| 8          | 170              | 1300      | 120            |
| 10         | 200              | 1500      | 120            |
| 15         | 200              | 1400      | 120            |

**Table S2.** Instrumental conditions for ICP-MS measurements Agilent 7900.

| ICP-MS conditions                               | Values          |
|-------------------------------------------------|-----------------|
| RF power (W)                                    | 1550            |
| Frequency (MHz)                                 | 27              |
| Plasma gas flow rate (L min <sup>-1</sup> )     | 15              |
| Auxiliary gas flow rate (L min <sup>-1</sup> )  | 1               |
| Nebulizer gas flow rate (L min <sup>-1</sup> )  | 1               |
| Palma Mode                                      | General Purpose |
| Omega Bias (V)                                  | -120            |
| Omega lens (V)                                  | 9.3             |
| Extract 2 (V)                                   | -245            |
| Deflect Lens (V)                                | 1.0             |
| Energy discrimination (V)                       | 5               |
| Collision Gas flow rate (mL min <sup>-1</sup> ) | 5               |
| Cell Entrance (V)                               | -40             |
| Cell Exit (V)                                   | -60             |

**Table S3.** Quality control results (µg g<sup>-1</sup> dry weight) obtained from ICP-MS analysis of “Standard Reference Material 1575a” trace elements in pine needles (*Pinus taeda*).

| Elements   | Certificated Material Value<br>Mean ± SD |   |        | Measured<br>Mean ± SD |   |        |
|------------|------------------------------------------|---|--------|-----------------------|---|--------|
| P (%)      | 0.107                                    | ± | 0.008  | 0.105                 | ± | 0.004  |
| K (%)      | 0.417                                    | ± | 0.007  | 0.406                 | ± | 0.016  |
| Al (mg/kg) | 580                                      | ± | 30     | 583                   | ± | 24     |
| Ba (mg/kg) | 6.0                                      | ± | 0.2    | 5.90                  | ± | 0.13   |
| Cd (mg/kg) | 0.233                                    | ± | 0.004  | 0.229                 | ± | 0.006  |
| Cu (mg/kg) | 2.8                                      | ± | 0.2    | 2.91                  | ± | 0.09   |
| Fe (mg/kg) | 46                                       | ± | 2      | 45.52                 | ± | 1.86   |
| Hg (mg/kg) | 0.0399                                   | ± | 0.0007 | 0.0436                | ± | 0.0022 |
| Zn (mg/kg) | 38                                       | ± | 2      | 36.30                 | ± | 1.37   |
| Elements   | Reference Value Mean ± SD                |   |        |                       |   |        |
| Mg (%)     | 0.106                                    | ± | 0.017  | 0.110                 | ± | 0.003  |
| As (mg/kg) | 0.039                                    | ± | 0.002  | 0.038                 | ± | 0.000  |
| Co (mg/kg) | 0.061                                    | ± | 0.002  | 0.061                 | ± | 0.001  |
| Pb (mg/kg) | 0.167                                    | ± | 0.015  | 0.166                 | ± | 0.007  |
| Mn (mg/kg) | 488                                      | ± | 12     | 470                   | ± | 9      |
| Ni (mg/kg) | 1.47                                     | ± | 0.10   | 1.46                  | ± | 0.02   |

**Table S4.** Quality control results ( $\mu\text{g g}^{-1}$  dry weight) obtained from ICP-MS analysis of “Standard Reference Material 2709a” trace elements in San Joaquin soil.

| Elements   | Certificated Material Value   |       |       | Measured      |       |       |
|------------|-------------------------------|-------|-------|---------------|-------|-------|
|            | Mean $\pm$ SD                 |       |       | Mean $\pm$ SD |       |       |
| Al (%)     | 7.37                          | $\pm$ | 0.16  | 7.00          | $\pm$ | 0.20  |
| Ca (%)     | 1.91                          | $\pm$ | 0.09  | 1.98          | $\pm$ | 0.12  |
| Fe (%)     | 3.36                          | $\pm$ | 0.07  | 3.24          | $\pm$ | 0.10  |
| Mg (%)     | 1.46                          | $\pm$ | 0.02  | 1.46          | $\pm$ | 0.09  |
| K (%)      | 2.11                          | $\pm$ | 0.06  | 2.10          | $\pm$ | 0.10  |
| Na (%)     | 1.22                          | $\pm$ | 0.003 | 1.20          | $\pm$ | 0.022 |
| Ti (%)     | 0.336                         | $\pm$ | 0.007 | 0.335         | $\pm$ | 0.009 |
| Sb (mg/kg) | 1.55                          | $\pm$ | 0.06  | 1.57          | $\pm$ | 0.07  |
| Ba (mg/kg) | 979                           | $\pm$ | 28    | 981           | $\pm$ | 0.90  |
| Cr (mg/kg) | 130                           | $\pm$ | 9     | 130           | $\pm$ | 0.93  |
| Co (mg/kg) | 12.8                          | $\pm$ | 0.2   | 11.9          | $\pm$ | 0.5   |
| Pb (mg/kg) | 17.3                          | $\pm$ | 0.1   | 17.8          | $\pm$ | 0.1   |
| Mn (mg/kg) | 529                           | $\pm$ | 18    | 531           | $\pm$ | 3     |
| Sr (mg/kg) | 239                           | $\pm$ | 6     | 241           | $\pm$ | 3     |
| V (mg/kg)  | 110                           | $\pm$ | 11    | 108           | $\pm$ | 12    |
| Elements   | Reference Value Mean $\pm$ SD |       |       |               |       |       |
| As (mg/kg) | 10.5                          | $\pm$ | 0.3   | 10.1          | $\pm$ | 0.16  |
| Cu (mg/kg) | 33.9                          | $\pm$ | 0.5   | 33.8          | $\pm$ | 0.16  |
| La (mg/kg) | 21.7                          | $\pm$ | 0.4   | 3.36          | $\pm$ | 0.07  |
| Hg (mg/kg) | 0.9                           | $\pm$ | 0.2   | 1.02          | $\pm$ | 0.07  |
| Ni (mg/kg) | 85                            | $\pm$ | 2     | 87            | $\pm$ | 0.9   |
| Zn (mg/kg) | 103                           | $\pm$ | 4     | 100           | $\pm$ | 6     |
